# Supplementary material for: The CpxQ sRNA Negatively Regulates Skp To Prevent Mistargeting of β-Barrel Outer Membrane Proteins into the Cytoplasmic Membrane
Source: PubMed Central journal article supplement (PMC4817254; doi:10.1128/mbio.00312-16), 2016-04-05
Supplement: mbo002162753sf1.pdf [file mbo002162753sf1.pdf]

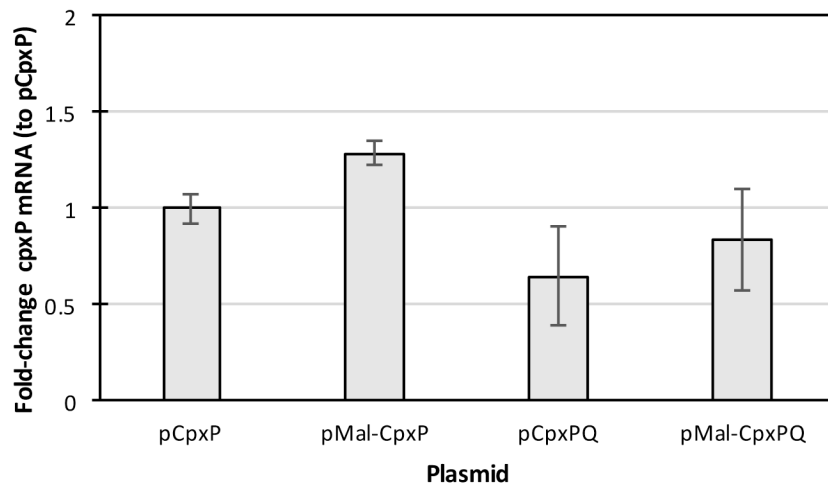

1

2 **Figure S1. Relative abundance of *cpxP* mRNA produced from plasmid constructs.** Plasmid

3 carrying  $\Delta cpxP::kan$  strains were grown to mid-log phase. Total RNA was isolated (RNeasy,

4 Qiagen) and used to prepare cDNA. qRT-PCR was performed using primers *cpxP*\_qRT\_F (5'-

5 ctctgttaatgtagcgaactgg-3') and *cpxP*\_qRT\_R (5'-attcgttgatgatttctcgttt-3')

6 that amplify a 208 bp product within the *cpxP* ORF. Fold-change was calculated by the  $\Delta\Delta C_t$

7 method. Data represent two biological replicates.

8
