# Supplementary material for: The CpxQ sRNA Negatively Regulates Skp To Prevent Mistargeting of β-Barrel Outer Membrane Proteins into the Cytoplasmic Membrane
Source: PubMed Central journal article supplement (PMC4817254; doi:10.1128/mbio.00312-16), 2016-04-05
Supplement: mbo002162753st1.pdf [file mbo002162753st1.pdf]

9 **Table S1 Strains and plasmids used in this study**

| Strain or plasmids                           | Genotype or description                                                                          | Reference or source        |
|----------------------------------------------|--------------------------------------------------------------------------------------------------|----------------------------|
| MC4100                                       | F <i>araD139</i> $\Delta$ ( <i>arg-lac</i> ) <i>U169 rpsL150 relA1 flbB5301 deoC1 ptsF25 thi</i> | (Casadaban, 1976)          |
| NR754                                        | MC4100 Ara+                                                                                      | (Button et al., 2007)      |
| MG2298                                       | NR754 <i>cpxP::rrnB-bla</i> / pHJ13                                                              | This study                 |
| MG2299                                       | NR754 <i>cpxPQ::rrnB-bla</i> / pHJ13                                                             | This study                 |
| MG2587                                       | NR754 <i>cpxP::rrnB-bla</i> / pHJ8                                                               | This study                 |
| MG2588                                       | NR754 <i>cpxPQ::rrnB-bla</i> / pHJ8                                                              | This study                 |
| MG2582                                       | NR754 $\Delta$ <i>cpxP::kan</i> / pTtrc99A                                                       | This study                 |
| MG2583                                       | NR754 $\Delta$ <i>cpxP::kan</i> / pCpxP                                                          | This study                 |
| MG2584                                       | NR754 $\Delta$ <i>cpxP::kan</i> / pMal-CpxP                                                      | This study                 |
| MG2585                                       | NR754 $\Delta$ <i>cpxP::kan</i> / pCpxPQ                                                         | This study                 |
| MG2586                                       | NR754 $\Delta$ <i>cpxP::kan</i> / pMal-CpxPQ                                                     | This study                 |
| DY378                                        | W3110 $\lambda$ cI857 $\Delta$ ( <i>cro-bioA</i> )                                               | (Yu et al., 2000)          |
| DK10                                         | DY378 $\Delta$ <i>cpxP::kan</i>                                                                  | This study                 |
| <b>Transcriptional LacZ reporter strains</b> |                                                                                                  |                            |
| TR50                                         | MC4100 $\lambda$ RS88[ <i>cpxP'</i> - <i>lacZ</i> <sup>+</sup> ]                                 | (Raivio and Silhavy, 1997) |
| MG2404                                       | MC4100 $\lambda$ RS88[ <i>cpxP'</i> - <i>lacZ</i> <sup>+</sup> ] <i>cpxP::rrnB-kan</i>           | This study                 |
| MG2405                                       | MC4100 $\lambda$ RS88[ <i>cpxP'</i> - <i>lacZ</i> <sup>+</sup> ] <i>cpxPQ::rrnB-kan</i>          | This study                 |
| MG2399                                       | MC4100 $\lambda$ RS88[ <i>cpxP'</i> - <i>lacZ</i> <sup>+</sup> ] <i>cpxA17</i>                   | This study                 |
| MG2410                                       | MC4100 $\lambda$ RS88[ <i>cpxP'</i> - <i>lacZ</i> <sup>+</sup> ] <i>cpxA17 cpxP::rrnB-kan</i>    | This study                 |
| MG2411                                       | MC4100 $\lambda$ RS88[ <i>cpxP'</i> - <i>lacZ</i> <sup>+</sup> ] <i>cpxA17 cpxPQ::rrnB-kan</i>   | This study                 |
| TR50                                         | MC4100 $\lambda$ RS88[ <i>degP'</i> - <i>lacZ</i> <sup>+</sup> ]                                 | (Raivio and Silhavy, 1997) |
| MG2406                                       | MC4100 $\lambda$ RS88[ <i>degP'</i> - <i>lacZ</i> <sup>+</sup> ] <i>cpxP::rrnB-kan</i>           | This study                 |
| MG2407                                       | MC4100 $\lambda$ RS88[ <i>degP'</i> - <i>lacZ</i> <sup>+</sup> ] <i>cpxPQ::rrnB-kan</i>          | This study                 |
| MG2398                                       | MC4100 $\lambda$ RS88[ <i>degP'</i> - <i>lacZ</i> <sup>+</sup> ] <i>cpxA17</i>                   | This study                 |
| MG2408                                       | MC4100 $\lambda$ RS88[ <i>degP'</i> - <i>lacZ</i> <sup>+</sup> ] <i>cpxA17 cpxP::rrnB-kan</i>    | This study                 |
| MG2409                                       | MC4100 $\lambda$ RS88[ <i>degP'</i> - <i>lacZ</i> <sup>+</sup> ] <i>cpxA17 cpxPQ::rrnB-kan</i>   | This study                 |
| <b><i>lamBA23D</i> strains</b>               |                                                                                                  |                            |

|                                     |                                                                   |                             |
|-------------------------------------|-------------------------------------------------------------------|-----------------------------|
| JHC285                              | MC4100 <i>zjb::Tn10 lamBA23D (cpxQ<sup>wt</sup>)</i>              | (Carlson and Silhavy, 1993) |
| MG2416                              | JHC285 <i>cpxP::rrnB-bla (ΔcpxQ)</i>                              | This study                  |
| MG2417                              | JHC285 <i>cpxPQ::rrnB-bla (cpxQ<sup>+</sup>)</i>                  | This study                  |
| MG2418                              | JHC285 <i>cpxA17 (cpxQ<sup>wt</sup>)</i>                          | This study                  |
| MG2419                              | JHC285 <i>cpxA17 cpxP::rrnB-bla (ΔcpxQ)</i>                       | This study                  |
| MG2420                              | JHC285 <i>cpxA17 cpxPQ::rrnB-bla (cpxQ<sup>+</sup>)</i>           | This study                  |
| MG2421                              | JHC285 <i>cpxA24 (cpxQ<sup>wt</sup>)</i>                          | This study                  |
| MG2422                              | JHC285 <i>cpxA24 cpxP::rrnB-bla (ΔcpxQ)</i>                       | This study                  |
| MG2423                              | JHC285 <i>cpxA24 cpxPQ::rrnB-bla (cpxQ<sup>+</sup>)</i>           | This study                  |
| MG2607                              | JHC285 / pTrec99A                                                 | This study                  |
| MG2608                              | JHC285 / pCpxP                                                    | This study                  |
| MG2713                              | MG2416 / pTrec99A                                                 | This study                  |
| MG2630                              | MG2416 / pCpxP                                                    | This study                  |
| MG2714                              | MG2417 / pTrec99A                                                 | This study                  |
| MG2631                              | MG2417 / pCpxP                                                    | This study                  |
| MG2415                              | MG2419 / pTrec99A                                                 | This study                  |
| MG2631                              | MG2419 / pCpxP                                                    | This study                  |
| MG2716                              | MG2420 / pTrec99A                                                 | This study                  |
| MG2633                              | MG2420 / pCpxP                                                    | This study                  |
| MG2634                              | MG2416 <i>Δskp::kan</i>                                           | This study                  |
| MG2635                              | MG2417 <i>Δskp::kan</i>                                           | This study                  |
| MG2637                              | MG2419 <i>Δskp::kan</i>                                           | This study                  |
| MG2638                              | MG2420 <i>Δskp::kan</i>                                           | This study                  |
| MG2640                              | MG2422 <i>Δskp::kan</i>                                           | This study                  |
| MG2641                              | MG2423 <i>Δskp::kan</i>                                           | This study                  |
| <b><i>lamB-lacZ42-1</i> strains</b> |                                                                   |                             |
| JCM912                              | MC4100 $\Phi(lamB-lacZ)hyb42-1 cpxA^+$                            | (Dwyer et al., 2014)        |
| WBS226                              | MC4100 $\Phi(lamB-lacZ) hyb42-1 cpxA17$                           | (Cosma et al., 1995)        |
| NJH187                              | MC4100 $\Phi(lamB-lacZ) hyb42-1 cpxA24$                           | (Cosma et al., 1995)        |
| MG2566                              | JCM912 <i>cpxA<sup>+</sup> cpxP::rrnB-kan (ΔcpxQ)</i>             | This study                  |
| MG2567                              | JCM912 <i>cpxA<sup>+</sup> cpxPQ::rrnB-kan (cpxQ<sup>+</sup>)</i> | This study                  |
| MG2568                              | WBS226 <i>cpxA17 cpxP::rrnB-kan (ΔcpxQ)</i>                       | This study                  |
| MG2569                              | WBS226 <i>cpxA17 cpxPQ::rrnB-kan (cpxQ<sup>+</sup>)</i>           | This study                  |
| MG2570                              | NJH187 <i>cpxA24 cpxP::rrnB-kan (ΔcpxQ)</i>                       | This study                  |

|                                    |                                                                                                                                   |                       |
|------------------------------------|-----------------------------------------------------------------------------------------------------------------------------------|-----------------------|
| MG2571                             | NJH187 <i>cpxA24 cpxPQ::rrnB-kan (cpxQ<sup>+</sup>)</i>                                                                           | This study            |
| <b><i>H*lamB-lacZ</i> strains</b>  |                                                                                                                                   |                       |
| JCM944                             | MC4100 Ara <sup>+</sup> $\phi$ ( <i>H*lamB</i> '-' <i>lacZ</i> ) Hyb42-1 [ $\lambda$ p1(209)]                                     | (Dwyer et al., 2014)  |
| MG2673                             | JCM944 <i>cpxA<sup>+</sup> cpxP::rrnB-bla (<math>\Delta</math>cpxQ)</i>                                                           | This study            |
| MG2674                             | JCM944 <i>cpxA<sup>+</sup> cpxPQ::rrnB-bla (cpxQ<sup>+</sup>)</i>                                                                 | This study            |
| MG2614                             | JCM944 <i>cpxA17 cpxP::rrnB-bla (<math>\Delta</math>cpxQ)</i>                                                                     | This study            |
| MG2615                             | JCM944 <i>cpxA17 cpxPQ::rrnB-bla (cpxQ<sup>+</sup>)</i>                                                                           | This study            |
| MG2616                             | JCM944 <i>cpxA24 cpxP::rrnB-bla (<math>\Delta</math>cpxQ)</i>                                                                     | This study            |
| MG2617                             | JCM944 <i>cpxA24 cpxPQ::rrnB-bla (cpxQ<sup>+</sup>)</i>                                                                           | This study            |
| <b><i>lamB-lacZX90</i> strains</b> |                                                                                                                                   |                       |
| JCM914                             | MC4100 Ara <sup>+</sup> $\phi$ ( <i>lamB</i> '-' <i>lacZX90</i> ) Hyb42-1 [ $\lambda$ p1(209)]                                    | (Dwyer et al., 2014)  |
| MG2384                             | JCM914 <i>cpxA<sup>+</sup> cpxP::rrnB-bla (<math>\Delta</math>cpxQ)</i>                                                           | This study            |
| MG2385                             | JCM914 <i>cpxA<sup>+</sup> cpxPQ::rrnB-bla (cpxQ<sup>+</sup>)</i>                                                                 | This study            |
| MG2386                             | JCM914 <i>cpxA17 cpxP::rrnB-bla (<math>\Delta</math>cpxQ)</i>                                                                     | This study            |
| MG2387                             | JCM914 <i>cpxA17 cpxPQ::rrnB-bla (cpxQ<sup>+</sup>)</i>                                                                           | This study            |
| MG2388                             | JCM914 <i>cpxA24 cpxP::rrnB-bla (<math>\Delta</math>cpxQ)</i>                                                                     | This study            |
| MG2389                             | JCM914 <i>cpxA24 cpxPQ::rrnB-bla (cpxQ<sup>+</sup>)</i>                                                                           | This study            |
| <b>Plasmids</b>                    |                                                                                                                                   |                       |
| pTrc99A                            | Cloning vector, pBR322 <i>ori</i> , Amp <sup>R</sup>                                                                              | Lab stocks            |
| pCpxP                              | <i>cpxP</i> cloned into <i>EcoRI-HindIII</i> of pTrc99A, Amp <sup>R</sup>                                                         | (Raivio et al., 1999) |
| pMal-CpxP                          | <i>malE-cpxP</i> cloned into <i>EcoRI-HindIII</i> of pTrc99A, Amp <sup>R</sup>                                                    | This study            |
| pCpxPQ                             | <i>cpxPQ</i> with entire 3' intergenic region cloned into <i>EcoRI-HindIII</i> of pTrc99A, Amp <sup>R</sup>                       | This study            |
| pMal-CpxPQ                         | <i>malE-cpxPQ</i> with entire 3' intergenic region cloned into <i>EcoRI-HindIII</i> of pTrc99A, Amp <sup>R</sup>                  | This study            |
| pMal-CpxPQshort                    | <i>malE-cpxPQ</i> with shortened 3'UTR cloned into <i>EcoRI-HindIII</i> of pTrc99A, Amp <sup>R</sup>                              | This study            |
| pBAD33                             | Cloning vector, pACYC <i>ori</i> , Cam <sup>R</sup>                                                                               | (Guzman et al., 1995) |
| pBAD33 <i>cpxQ</i>                 | <i>cpxQ</i> cloned at the transcriptional start site downstream from P <sub>araBAD</sub> with primers pBAD_sRNA_F and pBAD_sRNA_R | This study            |
