# Supplementary material for: The CpxQ sRNA Negatively Regulates Skp To Prevent Mistargeting of β-Barrel Outer Membrane Proteins into the Cytoplasmic Membrane
Source: PubMed Central journal article supplement (PMC4817254; doi:10.1128/mbio.00312-16), 2016-04-05
Supplement: mbo002162753st2.pdf [file mbo002162753st2.pdf]

11 **Table S2 Oligonucleotides used in this study**

| Name             | Sequence (5' – 3')                                                                                       |
|------------------|----------------------------------------------------------------------------------------------------------|
| cpxP_5           | TCTCTATCGTTGAATCGCGACA                                                                                   |
| cpxP_3           | CGCTAGTATAACGGAAGCAAATCATCTGCAATGCATTAAGCAGCAGGCAAGTTTTTT<br>TGTTTGCAAGCAGCA                             |
| cpxP_3_HindIII   | TCAAGCTTAAATACTCCCGCTATCAACTGAC                                                                          |
| cpxP_3s_HindIII  | ATCAAGCTTGAGGATAAAAAAACCCCCAC                                                                            |
| cpxP_intF_BglIII | ATGCGAGATCTTATGCAACAG                                                                                    |
| cpxP5'Eco        | GGAATTCCTCTCTATCGTTGAATCGCG                                                                              |
| mg_pCpxP         | GCAAGGAAAACAAGCTTTACTACTGG                                                                               |
| OE_MalE_F        | GACAGAAAGATTTTGGGAGCAAATGATGAAAATAAAAAACAGGTGCACGCATCC                                                   |
| ssMalE_R         | CCAGTTATCGCCTGAACCGACTTCAGCGGCGAGAGCCGAGGCGGAAAACATC                                                     |
| Chr_Amp2Kan_p1   | TCAAATTAAGCAGAAGGCCATCCTGACGGATGGCCTTTTTGCGTTTCTACAAACTCT<br>TTTTGTTTATTTTTCTAAATACAGTGTAGGCTGGAGCTGCTTC |
| Chr_Amp2Kan_p2   | TGATTCATAAATACTCCCGCTATCAACTGACGCTAGTATAACGGAAGCAAATCATCT<br>GCAATGCATTAAGCAGCAGGCAAATGGGAATTAGCCATGGTCC |
| pBAD_sRNA_F      | GTTTTCTTGCCATAGACACCATCCCTGTCTTCCCCCACATGCTGTGGGGGTTTTTTT<br>TACAGATTAAATCAGAACGCAGAAGC                  |
| pBAD_sRNA_R      | TGGAGAAACAGTAGAGAGTTGCGATA                                                                               |
| cpxP_qRT_F       | CTCCTGTTAATGTTAGCGAACTGG                                                                                 |
| cpxP_qRT_R       | ATTCGTTGTTGATGTTTCTCGTTT                                                                                 |
